# Supplementary material
Source: HighWire-hosted journal article supplement (https://bmjopen.bmj.com/content/12/5/e060255)
Supplement: inline-supplementary-material-1 [file inline-supplementary-material-1.pdf]

## S1. Search strategy used for manual search in PROSPERO

Search string:

(prevention OR transmission OR prophyla\*) AND (covid-19 OR sars-cov-2 OR coronavirus OR sars-cov OR sars OR mers)

AND (

(BCG OR vaccine OR vaccines OR vaccination)

OR (personal protective equipment OR gloves OR mask OR PPE)

OR (public health OR social distancing OR physical distancing OR screening)

)
