# Supplementary material
Source: HighWire-hosted journal article supplement (https://bmjopen.bmj.com/content/12/5/e060255)
Supplement: inline-supplementary-material-3 [file inline-supplementary-material-3.pdf]

### S3. Search strategy used for automatic search in COVID-19 L-OVE

The following search string is used as the main Boolean strategy by the repository COVID-19 L-OVE to identify articles that address any issue concerning COVID-19. According to the repository providers,[1] it is adapted to the syntax of each source and complemented by manual searches.

```
*COVID* OR *coronavir* OR *coronovir* OR *betacoronavir* OR *beta-coronavirus* OR "corona virus" OR "virus corona" OR "corono virus" OR "virus corono" OR *neocoronavir* OR hcov* OR *2019-ncov* OR *cv19* OR *cv-19* OR "cv 19" OR n-cov* OR ncov* OR (wuhan* AND (virus OR viruses OR viral)) OR *cv-19* OR sars* OR sari OR "severe acute respiratory syndrome" OR antisars* OR anti-sars* OR "corona patients" OR *pandemi*
```

The following sources are used for the automated searches:

- Pubmed/medline (updated several times a day)
- EMBASE (updated weekly)
- CINAHL (updated weekly)
- PsycINFO (updated weekly)
- LILACS (Latin American & Caribbean Health Sciences Literature) (updated weekly)
- Wanfang Database (updated every 2 weeks)
- CBM - Chinese Biomedical Literature Database (updated every 2 weeks)
- CNKI - Chinese National Knowledge Infrastructure (updated every 2 weeks)
- VIP - Chinese Scientific Journal Database (updated every 2 weeks)
- IRIS (WHO Institutional Repository for Information Sharing) (updated weekly)
- IRIS PAHO (PAHO Institutional Repository for Information Sharing) (updated weekly)
- IBECs - Índice Bibliográfico Español en Ciencias de la Salud (Spanish Bibliographic Index on Health Sciences) (updated weekly)
- Microsoft Academic (last searched: 23 August 2021)
- ICTRP Search Portal (updated daily)
- Clinicaltrials.gov (updated daily)
- ISRCTN registry (updated daily)
- Chinese Clinical Trial Registry (updated daily)
- IRCT - Iranian Registry of Clinical Trials (updated daily)
- EU Clinical Trials Register: Clinical trials for covid-19 (updated daily)
- NIPH Clinical Trials Search (Japan) - Japan Primary Registries Network (JPRN) (JapicCTI, JMACCT CTR, jRCT, UMIN CTR) (updated daily, via ICTRP search portal)
- UMIN-CTR - UMIN Clinical Trials Registry (updated daily, via ICTRP search portal)
- JRCT - Japan Registry of Clinical Trials (updated daily, via ICTRP search portal)
- JAPIC Clinical Trials Information (updated daily, via ICTRP search portal)
- Clinical Research Information Service (CRiS), Republic of Korea (updated daily, via ICTRP search portal)
- ANZCTR - Australian New Zealand Clinical Trials Registry (updated daily, via ICTRP search portal)
- ReBec - Brazilian Clinical Trials Registry (updated daily, via ICTRP search portal)
- CTRI - Clinical Trials Registry - India (updated daily, via ICTRP search portal)
- RPCEC - Cuban Public Registry of Clinical Trials (updated daily, via ICTRP search portal)
- DRKS - German Clinical Trials Register (updated daily, via ICTRP search portal)
- LBCTR - Lebanese Clinical Trials Registry (updated daily, via ICTRP search portal)
- TCTR - Thai Clinical Trials Registry (updated daily, via ICTRP search portal)

- NTR - The Netherlands National Trial Register (updated daily, via ICTRP search portal)
- PACTR - Pan African Clinical Trial Registry (updated daily, via ICTRP search portal)
- REPEC - Peruvian Clinical Trial Registry (updated daily, via ICTRP search portal)
- SLCTR - Sri Lanka Clinical Trials Registry (updated daily, via ICTRP search portal)
- medRxiv (updated several times a day)
- bioRxiv (updated several times a day)
- SSRN Preprints (updated several times a day)
- ChinaXiv (updated every 2 weeks)
- SciELO Preprints (updated weekly)
- Research Square (updated daily)

We used the database as follows:

|                                           |                                                     |
|-------------------------------------------|-----------------------------------------------------|
| Filters:                                  | “Prevention and treatment”,<br>“Systematic reviews” |
| Date of the search:                       | 05/05/2021                                          |
| Number of hits imported into Endnote:     | 2,179                                               |
| After automatic deduplication in Endnote: | 2,154                                               |

## References

1. Epistemonikos Foundation. COVID-19 Evidence (accessed Mar 30). Available from: [https://app.iloveevidence.com/loves/5e6fdb9669c00e4ac072701d?intervention\\_variable=603b9fe03d05151f35cf13dc&section=methods&classification=all](https://app.iloveevidence.com/loves/5e6fdb9669c00e4ac072701d?intervention_variable=603b9fe03d05151f35cf13dc&section=methods&classification=all).
