# Supplementary material
Source: HighWire-hosted journal article supplement (https://bmjopen.bmj.com/content/12/5/e060255)
Supplement: inline-supplementary-material-4 [file inline-supplementary-material-4.pdf]

## S4. Characteristics of systematic review protocols identified in PROSPERO for prevention of COVID-19

Table 1 Characteristics of systematic review protocols identified in PROSPERO for prevention of COVID-19

| Corresponding author               | Country of affiliation of the review <sup>a</sup> | Review type            | Population                                                                                                         | Intervention                                                              | Outcomes                                                                                        | Study type included | Registration date | Anticipated completion date | Link <sup>b</sup>      | Publication (date of publication) |
|------------------------------------|---------------------------------------------------|------------------------|--------------------------------------------------------------------------------------------------------------------|---------------------------------------------------------------------------|-------------------------------------------------------------------------------------------------|---------------------|-------------------|-----------------------------|------------------------|-----------------------------------|
| Public health interventions (n=20) |                                                   |                        |                                                                                                                    |                                                                           |                                                                                                 |                     |                   |                             |                        |                                   |
| Ahmed                              | USA                                               | SR, MA                 | persons working in non-healthcare or non-school settings (general population)                                      | workplace Non-pharmaceutical measures                                     | COVID-19 incidence, hospitalizations, COVID-19 mortality                                        | RCT, NRSI, MS       | 04/05/2020        | 31/07/2020                  | <a href="#">182660</a> | no                                |
| Ayouni                             | Tunisia                                           | SR                     | general population                                                                                                 | PHIs                                                                      | effectiveness of mitigation of the spread of COVID-19                                           | RCT, NRSI           | 30/06/2020        | 17/08/2020                  | <a href="#">196018</a> | no                                |
| Cuadrado                           | Chile                                             | living SR              | school population                                                                                                  | school practices to promote social distancing                             | all-cause/COVID-19 mortality, COVID-19 infection rate, reproduction number                      | RCT, NRSI, MS       | 21/04/2020        | 17/05/2020                  | <a href="#">180701</a> | no                                |
| Delgrange                          | UK, England                                       | rapid SR               | high-income countries or economies (general population)                                                            | PHIs                                                                      | mortality, COVID-19 incidence, COVID-19 reproduction number,                                    | n.r.                | 19/05/2020        | 31/07/2020                  | <a href="#">183989</a> | no                                |
| Elchall                            | Cochrane France                                   | living SR, MA, NMA     | high risk patients, close contacts of COVID-19 patients, healthcare workers, healthy volunteers (mixed population) | vaccination, prophylactic interventions, PPE, movement control strategies | COVID-19 incidence, hospital or ICU admissions or death, all-cause mortality, clinical efficacy | RCT, NRSI           | 28/04/2020        | 31/12/2021                  | <a href="#">182600</a> | no                                |
| Frazer                             | UK, Ireland                                       | SR                     | adults in long term care facilities (residents, employees, visitors) (high risk population)                        | any intervention to reduce COVID-19 transmission                          | COVID-19 morbidity, symptoms, mortality                                                         | any type            | 02/07/2020        | 31/08/2020                  | <a href="#">191569</a> | yes, preprint (03/11/2020)        |
| Fuentealba-Torres                  | Chile                                             | rapid SR               | countries in COVID-19 pandemic (general population)                                                                | quarantine restrictions                                                   | COVID-19 incidence, prevalence, mortality                                                       | NRSI, MS            | 05/05/2020        | 31/01/2021                  | <a href="#">183701</a> | no                                |
| Iezadi                             | USA                                               | SR, realist review, MA | general population                                                                                                 | PHIs                                                                      | COVID-19 incidence, basic reproduction number, mortality                                        | NRSI                | 20/05/2020        | 28/02/2021                  | <a href="#">186855</a> | no                                |
| Juneau                             | Canada                                            | SR                     | general population                                                                                                 | contact tracing                                                           | COVID-19 transmission                                                                           | RCT, NRSI, MS       | 14/07/2020        | 13/08/2020                  | <a href="#">198462</a> | yes, preprint (25/07/2020)        |
| Khatib                             | India                                             | rapid SR, MA           | individuals at risk for COVID-19 (most likely high risk population)                                                | WASH (Water, sanitation and Hygiene) interventions                        | COVID-19 incidence, hospitalisations, COVID-19 mortality, safety                                | NRSI, MS            | 16/04/2020        | 11/05/2020                  | <a href="#">179663</a> | no                                |

|                                             |                           |          |                                                                                                        |                                                                                                  |                                                                                                                                   |               |            |            |                        |                                                          |
|---------------------------------------------|---------------------------|----------|--------------------------------------------------------------------------------------------------------|--------------------------------------------------------------------------------------------------|-----------------------------------------------------------------------------------------------------------------------------------|---------------|------------|------------|------------------------|----------------------------------------------------------|
| Li                                          | China                     | SR, MA   | people at risk of infection from COVID-19, MERS or SARS (high risk population)                         | physical interventions (PI, e.g., hand hygiene, PPE, isolation, social distancing)               | mortality, COVID-19 incidence and severity, hospital admissions, safety                                                           | any type      | 15/04/2020 | 15/08/2020 | <a href="#">178638</a> | no                                                       |
| Mbakaya                                     | Malawi                    | SR       | any community setting (workplace, market, school settings, family, neighbourhood) (general population) | any community-based measures to prevent COVID-19                                                 | COVID-19 incidence, transmission                                                                                                  | NRSI, MS      | 18/08/2020 | 30/10/2020 | <a href="#">204984</a> | yes, preprint (30/10/2020)                               |
| Milanese                                    | Australia                 | rapid SR | general population                                                                                     | screening tools                                                                                  | COVID-19 infections                                                                                                               | NRSI, MS      | 21/08/2020 | 15/10/2020 | <a href="#">205274</a> | no                                                       |
| Oliveira                                    | Brazil                    | SR       | general population                                                                                     | any intervention (based on health promotion)                                                     | effectiveness (universal health and social protection coverage)                                                                   | RCT, NRSI     | 20/04/2020 | 30/06/2020 | <a href="#">180066</a> | no                                                       |
| Pearce-Smith                                | Public Health England, UK | rapid SR | persons in school setting (children and staff)                                                         | school measures during COVID-19 pandemic (re-openings, limited closures, other control measures) | SARS-CoV-2 infection rate in children and staff, transmission of SARS-CoV-2 within school settings, COVID-19 outbreaks in schools | RCT, NRSI, MS | 15/06/2020 | 24/07/2020 | <a href="#">191867</a> | yes, online document (09/04/2021)                        |
| Pintel Ramos                                | Brazil                    | SR       | health care workers (high risk population)                                                             | recommendations for prevention (e.g., using PPE)                                                 | COVID-19 infections in healthcare workers                                                                                         | NRSI          | 12/08/2020 | 11/12/2020 | <a href="#">190491</a> | no                                                       |
| Schuneman                                   | Canada                    | rapid SR | close contacts of COVID-19 patients (high risk population)                                             | distance (1m+) with or without mask and/or eye protection                                        | disease transmission, COVID-19 infection, acceptability, disease severity                                                         | any type      | 16/04/2020 | 28/04/2020 | <a href="#">177047</a> | yes, journal (01/06/2020), preprint (26/05/2020)         |
| Shah                                        | India                     | SR, MA   | general population                                                                                     | PHIs                                                                                             | COVID-19 infection rate, recovery rate, mortality, rate of growth of cases                                                        | any type      | 20/04/2020 | 31/07/2020 | <a href="#">180528</a> | no                                                       |
| Silva                                       | Brazil                    | SR       | elderly (60+) in home care (high risk population)                                                      | measures to prevent COVID-19                                                                     | COVID-19 prevalence                                                                                                               | RCT, NRSI, QS | 12/06/2020 | 28/05/2021 | <a href="#">188952</a> | no                                                       |
| Wangge                                      | Indonesia                 | rapid SR | asymptomatic population in COVID-19 pandemic (general population)                                      | mass screening                                                                                   | COVID-19 incidence, mortality, transmission (basic reproduction number), resource use                                             | NRSI, MS      | 29/06/2020 | 06/07/2020 | <a href="#">190546</a> | yes, journal (18/12/2020)                                |
| <b>Personal protective equipment (n=10)</b> |                           |          |                                                                                                        |                                                                                                  |                                                                                                                                   |               |            |            |                        |                                                          |
| Al-Moraissi                                 | Saudi Arabia              | rapid SR | adult dental health care workers (high risk population)                                                | enhanced PPE                                                                                     | effectiveness against COVID-19 infection                                                                                          | RCT NRSI      | 25/06/2020 | 30/09/2020 | <a href="#">192912</a> | yes, preprint (23/11/2020)                               |
| Conceição de Jesus                          | Brazil                    | SR, MA   | healthcare workers assisting COVID-19 patients (high risk population)                                  | PPE                                                                                              | COVID-19 infections in healthcare workers                                                                                         | RCT, NRSI     | 20/04/2020 | 31/12/2020 | <a href="#">180264</a> | yes, journal, but not included <sup>c</sup> (05/09/2020) |
| Ekwaro                                      | Uganda                    | rapid SR | general population, healthcare workers in low- and middle                                              | masks (medical or non-medical)                                                                   | COVID-19 infections                                                                                                               | RCT, NRSI     | 20/08/2020 | 30/11/2020 | <a href="#">205136</a> | no                                                       |

|                          |                                                  |             |                                                                                                                                              |                                                  |                                                                                             |                   |            |            |                        |                            |
|--------------------------|--------------------------------------------------|-------------|----------------------------------------------------------------------------------------------------------------------------------------------|--------------------------------------------------|---------------------------------------------------------------------------------------------|-------------------|------------|------------|------------------------|----------------------------|
|                          |                                                  |             | income countries (mixed population)                                                                                                          |                                                  |                                                                                             |                   |            |            |                        |                            |
| Griswold                 | UK, England                                      | rapid SR    | healthcare workers in hospital setting during COVID-19 pandemic (esp. emergency neurosurgical care) (high risk population)                   | use of PPE, rapid testing, chest CT for patients | COVID-19 incidence                                                                          | RCT, NRSI         | 30/07/2020 | 31/08/2020 | <a href="#">198267</a> | no                         |
| Gupta                    | India                                            | SR          | general population                                                                                                                           | face mask (any type)                             | COVID-19 transmission: contacts/secondary attack ratio                                      | RCT, NRSI         | 06/05/2020 | 10/06/2020 | <a href="#">183807</a> | no                         |
| Kurniawan                | Indonesia                                        | SR          | general population                                                                                                                           | face mask (any type)                             | COVID-19 infections, COVID-19 mortality                                                     | RCT, NRSI         | 11/05/2020 | 01/09/2020 | <a href="#">184371</a> | no                         |
| Ortiz-Muñoz              | Chile                                            | SR, MA      | healthy population at risk of COVID-19, MERS, SARS (mixed population)                                                                        | gloves (any type)                                | COVID-19 infections, hospitalizations, all-cause mortality, safety                          | RCT, NRSI         | 27/05/2020 | 29/06/2020 | <a href="#">188674</a> | yes, preprint (26/01/2021) |
| Schmölzer                | International Liaison Committee on Resuscitation | SR, MA      | healthcare workers attending deliveries (high risk population)                                                                               | PPE                                              | transmission of COVID-19 infection to healthcare workers, quality of neonatal resuscitation | RCT, NRSI         | 16/04/2020 | 05/05/2020 | <a href="#">178250</a> | no                         |
| Silveira                 | Brazil                                           | SR, MA      | healthcare workers assisting COVID-19 patients (high risk population)                                                                        | techniques of using of PPE                       | COVID-19 infections in healthcare workers                                                   | RCT, NRSI         | 15/07/2020 | 30/11/2020 | <a href="#">198631</a> | no                         |
| Teoh                     | China                                            | SR, MA      | healthcare workers performing surgical, endoscopic and anaesthetic procedures on patients with COVID-19, SARS or MERS (high risk population) | use of PPE                                       | transmission of SARS-CoV-2, SARS-CoV and MERS-CoV, risk of infection                        | RCT, NRSI         | 28/04/2020 | 24/05/2020 | <a href="#">182298</a> | no                         |
| <b>Vaccination (n=9)</b> |                                                  |             |                                                                                                                                              |                                                  |                                                                                             |                   |            |            |                        |                            |
| Adhikari                 | Illinois, USA                                    | SR, MA      | adults (18+) with or without comorbidities (mixed population)                                                                                | BCG vaccine                                      | COVID-19 incidence and severity at 6 (9, 12) months                                         | RCT               | 24/04/2020 | 31/05/2021 | <a href="#">182122</a> | no                         |
| Alhassane                | France                                           | SR, NMA     | healthy adults (general population)                                                                                                          | COVID-19 vaccine                                 | COVID-19 incidence, immunogenicity, safety                                                  | RCT (phase I-III) | 23/07/2020 | 31/08/2021 | <a href="#">200012</a> | no                         |
| Azhir                    | Canada                                           | SR, MA, NMA | healthy adults (18-60) not previously infected (general population)                                                                          | COVID-19 vaccine                                 | all-cause mortality, COVID-19 incidence, safety                                             | RCT, NRSI         | 26/08/2020 | 31/10/2021 | <a href="#">204881</a> | no                         |
| Baliga                   | India                                            | SR, MA      | health care workers with or without comorbidities (high risk population)                                                                     | BCG vaccine                                      | COVID-19 mortality, COVID 19 incidence and severity                                         | RCT               | 08/06/2020 | 10/06/2021 | <a href="#">189394</a> | no                         |

|                                           |             |                        |                                                                                                             |                                                            |                                                                                                                  |                 |            |            |                        |                                   |
|-------------------------------------------|-------------|------------------------|-------------------------------------------------------------------------------------------------------------|------------------------------------------------------------|------------------------------------------------------------------------------------------------------------------|-----------------|------------|------------|------------------------|-----------------------------------|
| Henriques                                 | Portugal    | SR, MA                 | adults (18+) with or without comorbidities, healthcare professionals (mixed population)                     | BCG vaccine                                                | COVID-19 incidence and severity                                                                                  | RCT, NRSI       | 02/06/2020 | 31/07/2021 | <a href="#">188486</a> | no                                |
| Kwasi Korang                              | Denmark     | living SR, NMA, IPD-MA | people not previously infected (general population)                                                         | COVID-19 vaccine                                           | all-cause mortality, COVID-19 incidence, safety                                                                  | RCT             | 01/07/2020 | 01/06/2021 | <a href="#">196492</a> | no                                |
| Remón Torres                              | Peru        | SR, MA                 | healthy adults (18+) not previously infected with SARS-CoV-2 (general population)                           | COVID-19 vaccine                                           | COVID-19 incidence                                                                                               | RCT (phase III) | 28/08/2020 | 31/01/2022 | <a href="#">206390</a> | no                                |
| Singh                                     | India       | SR, MA                 | healthy people without pre-exposure or infection with COVID-19 (general population)                         | BCG vaccine                                                | COVID-19 mortality, COVID-19 incidence, safety                                                                   | RCT, NRSI       | 18/08/2020 | 15/10/2020 | <a href="#">204466</a> | yes, preprint (28/10/2020)        |
| Trunk                                     | Switzerland | SR, MA                 | children and adults (0-80) (general population)                                                             | BCG vaccine, MCV, OPV, SPV, DTP vaccine                    | COVID-19 incidence and severity                                                                                  | RCT, NRSI       | 01/05/2020 | 30/06/2021 | <a href="#">183428</a> | no                                |
| <b>Pharmaceutical interventions (n=4)</b> |             |                        |                                                                                                             |                                                            |                                                                                                                  |                 |            |            |                        |                                   |
| Lenza                                     | Brazil      | SR, MA                 | adults (18+) with household or occupational exposure (high risk population)                                 | CQ, HCQ                                                    | COVID-19 incidence and severity, hospitalisation, antibodies, mortality, clinical efficacy, safety               | RCT, NRSI       | 10/07/2020 | 31/12/2020 | <a href="#">197070</a> | no                                |
| Meremikwu                                 | Nigeria     | SR, MA                 | peoples at high risk of exposure to COVID-19 (high risk population)                                         | CQ, HCQ (+/- azithromycin or clarithromycin)               | COVID-19 incidence and severity; safety                                                                          | RCT, NRSI       | 02/06/2020 | 30/06/2020 | <a href="#">184020</a> | no                                |
| Quintanilla Sánchez                       | Mexico      | SR, MA                 | asymptomatic adults (18+) with exposure to COVID-19 (high risk population)                                  | CQ, HCQ                                                    | COVID-19 incidence, safety, hospitalisation                                                                      | RCT, NRSI       | 14/04/2020 | 30/04/2021 | <a href="#">177993</a> | no                                |
| Singh                                     | UK          | SR, MA                 | people at risk of exposure or with exposure to SARS-CoV-2 (high risk population)                            | CQ, HCQ (+/- other treatments)                             | COVID-19 incidence and severity, infections in close contacts, antibodies, mortality, clinical efficacy, safety, | RCT             | 19/05/2020 | 08/06/2020 | <a href="#">185220</a> | yes, Cochrane review (12/02/2021) |
| <b>Other interventions (n=4)</b>          |             |                        |                                                                                                             |                                                            |                                                                                                                  |                 |            |            |                        |                                   |
| El-Hajj Fuleihan                          | Lebanon     | SR, MA                 | adults (18+) (general population)                                                                           | vitamin D (supplementation, vitamin D deficiency)          | COVID-19 seropositivity, risk of positive seroconversion to family members                                       | RCT, NRSI       | 14/08/2020 | 12/11/2020 | <a href="#">203960</a> | yes, journal (24/03/2021)         |
| Hernández Vásquez                         | Peru        | SR                     | Individuals of all ages (healthy, pre-exposure, post-exposure to COVID-19, MERS or SARS) (mixed population) | chlorine dioxide, chlorine derivatives                     | clinical efficacy and safety                                                                                     | RCT, NRSI       | 27/07/2020 | 27/08/2020 | <a href="#">200641</a> | yes, journal (07/09/2020)         |
| Wang                                      | China       | living SR, MA          | asymptomatic people with/ without exposure (pre-/ post-exposure) to COVID-19 (mixed population)             | Western medicine, TCM agents; each alone or in combination | COVID-19-free survival, COVID-19 incidence, hospitalization, mortality, safety                                   | RCT, NRSI       | 08/06/2020 | 31/12/2021 | <a href="#">190210</a> | no                                |

|    |       |         |                                                                                                    |                           |                                                                 |     |            |            |                        |    |
|----|-------|---------|----------------------------------------------------------------------------------------------------|---------------------------|-----------------------------------------------------------------|-----|------------|------------|------------------------|----|
| Xu | China | SR, NMA | hospital workers and laboratory technicians in high-risk virus laboratories (high risk population) | TCM (extracts from herbs) | COVID-19 infections, time and rate of disappearance of symptoms | RCT | 20/04/2020 | 01/06/2021 | <a href="#">179399</a> | no |
|----|-------|---------|----------------------------------------------------------------------------------------------------|---------------------------|-----------------------------------------------------------------|-----|------------|------------|------------------------|----|

BCG=Bacillus Calmette-Guérin; COVID-19=Corona-Virus Disease 2019; CQ=Chloroquine; CT=Computer Tomography; DTP=Diphtheria-Tetanus-Pertussis; HCQ=Hydroxychloroquine; ICU=Intensive Care Unit; IPD=Individual Participant Data; MA=Meta-Analysis; MCV=Measles Containing Vaccine; MERS = Middle East Respiratory Syndrome; MS=Modelling Studies; NMA=Network Meta-Analysis; n.r.=not reported; NRSI=Non-Randomized Studies of Interventions including, cohort studies, case-control-studies, cross-sectional studies and case series/reports; OPV=Oral Polio Vaccine; PHI=Public Health Intervention; PPE=Personal Protective Equipment; QS=Qualitative Studies; RCT=Randomized Controlled Trials; SARS =Severe Acute Respiratory Syndrom; SPV=Smallpox Vaccine; SR=Systematic Review; TCM=Traditional Chinese Medicine.

<sup>a</sup>country of institutional affiliation of corresponding and/or first author

<sup>b</sup>Link to the PROSPERO protocol: [https://www.crd.york.ac.uk/prospéro/display\\_record.php?RecordID=>>Record-ID<<](https://www.crd.york.ac.uk/prospéro/display_record.php?RecordID=>>Record-ID<<)

<sup>c</sup>Publication found, but population, intervention, outcomes did not meet our inclusion criteria.
